# Supplementary material
Source: MDPI journal article supplement (https://www.mdpi.com/2073-445X/11/1/33)
Supplement: s1 [file s1]

**Table S2.** The richest in taxa families and genera of the native vascular flora of CVNP.

| <b>Family</b>           | <b>Taxa (No)</b> | <b>[ % ]</b>  | <b>Genera</b>     | <b>Taxa (No)</b> | <b>[ % ]</b>  |
|-------------------------|------------------|---------------|-------------------|------------------|---------------|
| <i>Asteraceae</i>       | 166              | 11.32         | <i>Trifolium</i>  | 30               | 2.04          |
| <i>Fabaceae</i>         | 129              | 8.79          | <i>Silene</i>     | 24               | 1.64          |
| <i>Poaceae</i>          | 110              | 7.50          | <i>Allium</i>     | 19               | 1.30          |
| <i>Caryophyllaceae</i>  | 93               | 6.34          | <i>Galium</i>     | 18               | 1.23          |
| <i>Lamiaceae</i>        | 82               | 5.59          | <i>Ranunculus</i> | 18               | 1.23          |
| <i>Brassicaceae</i>     | 80               | 5.45          | <i>Medicago</i>   | 15               | 1.02          |
| <i>Apiaceae</i>         | 76               | 5.18          | <i>Centaurea</i>  | 14               | 0.95          |
| <i>Boraginaceae</i>     | 41               | 2.79          | <i>Hieracium</i>  | 14               | 0.95          |
| <i>Rosaceae</i>         | 40               | 2.73          | <i>Veronica</i>   | 14               | 0.95          |
| <i>Rubiaceae</i>        | 37               | 2.52          | <i>Bromus</i>     | 13               | 0.89          |
| <i>Orchidaceae</i>      | 35               | 2.39          | <i>Vicia</i>      | 13               | 0.89          |
| <i>Ranunculaceae</i>    | 35               | 2.39          | <i>Viola</i>      | 13               | 0.89          |
| <i>Veronicaceae</i>     | 22               | 1.50          | <i>Geranium</i>   | 12               | 0.82          |
| <i>Alliaceae</i>        | 19               | 1.30          | <i>Sedum</i>      | 12               | 0.82          |
| <i>Polygonaceae</i>     | 19               | 1.30          | <i>Arabis</i>     | 11               | 0.75          |
| <i>Scrophulariaceae</i> | 19               | 1.30          | <i>Campanula</i>  | 11               | 0.75          |
| <i>Hyacinthaceae</i>    | 18               | 1.23          | <i>Rumex</i>      | 11               | 0.75          |
| <i>Crassulaceae</i>     | 17               | 1.16          | <i>Saxifraga</i>  | 11               | 0.75          |
| <i>Geraniaceae</i>      | 17               | 1.16          | <i>Verbascum</i>  | 11               | 0.75          |
| <i>Cyperaceae</i>       | 16               | 1.09          | <i>Astragalus</i> | 10               | 0.68          |
| <i>Campanulaceae</i>    | 15               | 1.02          | <i>Hypericum</i>  | 10               | 0.68          |
| <i>Orobanchaceae</i>    | 15               | 1.02          | <i>Linum</i>      | 10               | 0.68          |
| <i>Dipsacaceae</i>      | 14               | 0.95          | <i>Minuartia</i>  | 10               | 0.68          |
| <i>Valerianaceae</i>    | 14               | 0.95          | <i>Salvia</i>     | 10               | 0.68          |
| <b>Other</b>            | 338              | 23.04         | <b>Other</b>      | 1133             | 77.23         |
| <b>Total</b>            | <b>1467</b>      | <b>100.00</b> | <b>Total</b>      | <b>1467</b>      | <b>100.00</b> |
