# Supplementary material
Source: MDPI journal article supplement (https://www.mdpi.com/2073-445X/11/1/33)
Supplement: s1 [file s1]

**Table S3.** Life-form categories and species richness of the CVNP native flora.

| Life-form category     | Taxa (No)   | % of the total native flora |
|------------------------|-------------|-----------------------------|
| Aquatic                | 5           | 0.34                        |
| Chamaephyte            | 105         | 7.16                        |
| Geophyte (Cryptophyte) | 201         | 13.70                       |
| Hemicryptophyte        | 605         | 41.24                       |
| Phanerophyte           | 128         | 8.73                        |
| Therophyte             | 423         | 28.83                       |
| <b>Total</b>           | <b>1467</b> | <b>100.00</b>               |
