# Supplementary material
Source: MDPI journal article supplement (https://www.mdpi.com/2073-445X/11/1/33)
Supplement: s1 [file s1]

**Table S4.** Species richness and distribution among chorological groups and categories of the CVNP vascular flora.

| <b>Chorological groups<br/>and categories</b> | <b>Taxa (No)</b> | <b>[ % ]</b>  | <b>Total Number<br/>of taxa</b> | <b>[ % ]</b>  |
|-----------------------------------------------|------------------|---------------|---------------------------------|---------------|
| <b><u>Mediterranean taxa</u></b>              |                  |               | <b>618</b>                      | <b>42.13</b>  |
| Mediterranean                                 | 315              | 21.47         |                                 |               |
| Mediterranean-<br>European                    | 122              | 8.32          |                                 |               |
| Mediterranean-SW<br>Asian                     | 85               | 5.79          |                                 |               |
| East Mediterranean                            | 83               | 5.66          |                                 |               |
| Mediterranean-Atlantic                        | 13               | 0.89          |                                 |               |
| <b><u>Widely distributed taxa</u></b>         |                  |               | <b>462</b>                      | <b>31.49</b>  |
| European-SW Asian                             | 229              | 15.61         |                                 |               |
| Paleotemperate                                | 67               | 4.57          |                                 |               |
| Euro-Siberian                                 | 46               | 3.14          |                                 |               |
| Cosmopolitan                                  | 42               | 2.86          |                                 |               |
| European                                      | 33               | 2.25          |                                 |               |
| Circumtemperate                               | 27               | 1.84          |                                 |               |
| (Circum-)Boreal                               | 7                | 0.48          |                                 |               |
| Subtropical-tropical                          | 7                | 0.48          |                                 |               |
| Arctic-Alpine                                 | 4                | 0.27          |                                 |               |
| <b><u>Balkan taxa</u></b>                     |                  |               | <b>210</b>                      | <b>14.31</b>  |
| Balkan                                        | 113              | 7.70          |                                 |               |
| Balkan-Anatolia                               | 53               | 3.61          |                                 |               |
| Balkan-Italy                                  | 36               | 2.45          |                                 |               |
| Balkan-Central Europe                         | 8                | 0.55          |                                 |               |
| <b><u>Endemic taxa</u></b>                    |                  |               | <b>177</b>                      | <b>12.07</b>  |
| Endemic                                       | 177              | 12.07         |                                 |               |
| <b>Total</b>                                  | <b>1467</b>      | <b>100.00</b> | <b>1467</b>                     | <b>100.00</b> |
